# Supplementary material for: 6-Azauracil or 8-aza-7-deazaadenine nucleosides and oligonucleotides: the effect of 2′-fluoro substituents and nucleobase nitrogens on conformation and base pairing
Source: Royal Society of Chemistry journal article supplement (doi:10.1039/b715512c), 2008-01-01
Supplement: b715512c-addcorr.doc [file b715512c-addcorr.doc]

**Additions and corrections**

**6-Azauracil or 8-aza-7-deazaadenine nucleosides and oligonucleotides: the effect of 2’-fluoro substituents and nucleobase nitrogens on conformation and base pairing**

**Frank Seela and Padmaja Chittepu**

*Org. Biomol. Chem.*, DOI: 10.1039/b715512c

The authors regret the following error:

In the graphical abstract, Scheme 8 and Scheme 9 it was drawn that one sugar was in the *anti* and the other in the *syn* conformation. Both sugars should however be in the *anti* conformation as shown in the corrected versions below.

Graphical abstract:


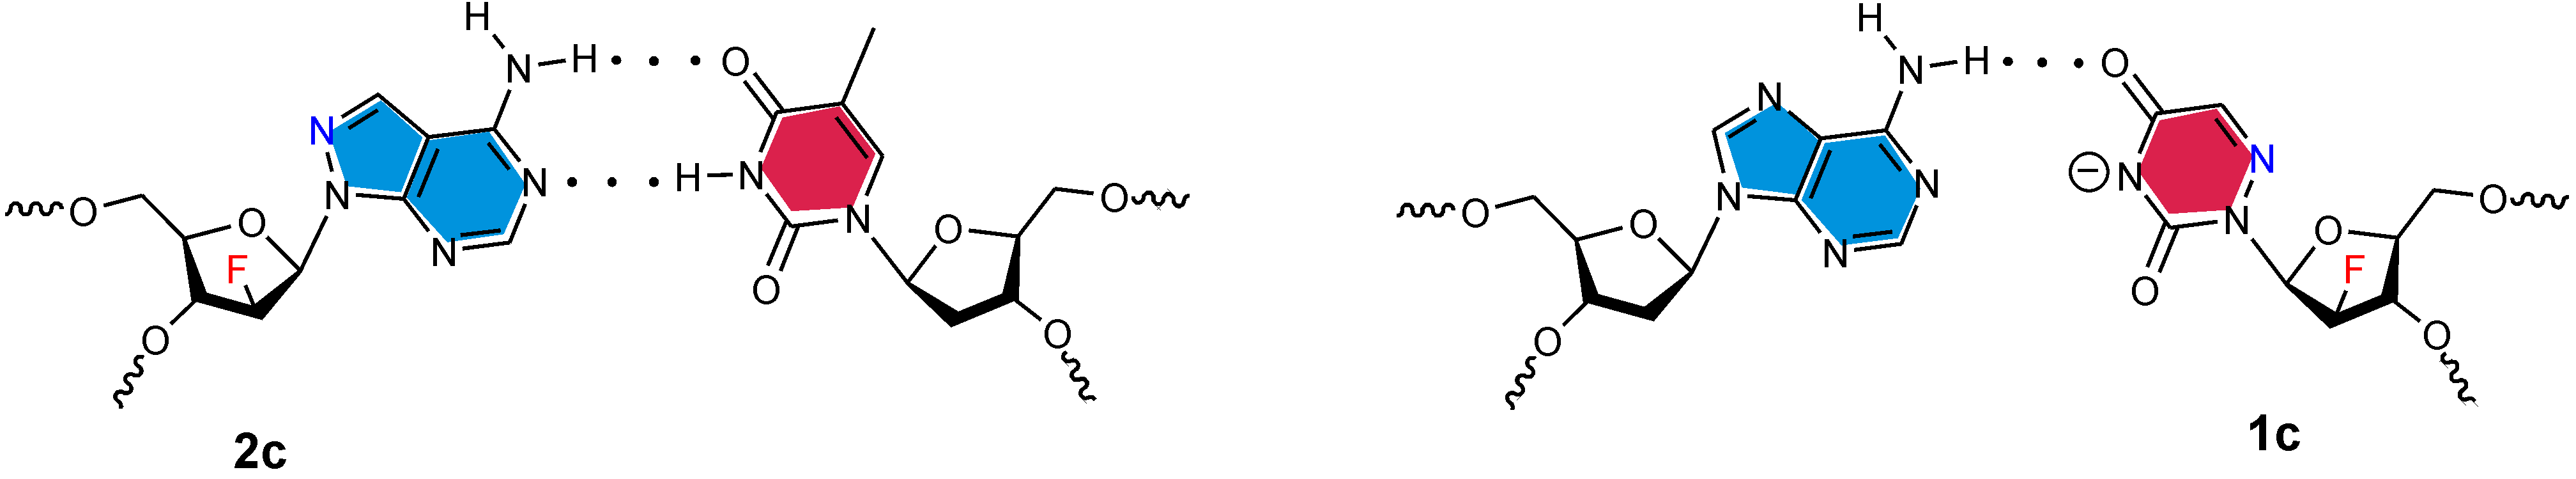


Scheme 8:

Scheme 9:

The Royal Society of Chemistry apologises for these errors and any consequent inconvenience to authors and readers.

**Additions and corrections can be viewed online by accessing the original article to which they apply.**

**This journal is © The Royal Society of Chemistry 2008**
